# Supplementary material for: Preparation and Properties of Polyimide Composite Membrane with High Transmittance and Surface Hydrophobicity for Lightweight Optical System
Source: MDPI journal article supplement (doi:10.3390/membranes12060592), 2022-06-03
Supplement: s1 [file s1]

# Preparation and Properties of Polyimide Composite Membrane with High Transmittance and Surface Hydrophobicity for Lightweight Optical System

Jiajia Yin <sup>1,\*†</sup>, Haohao Hui <sup>2,†</sup>, Bin Fan <sup>1</sup>, Jiang Bian <sup>1</sup>, Junfeng Du <sup>1</sup> and Hu Yang <sup>1</sup>

<sup>1</sup> Institute of Optics and Electronics, Chinese Academy of Sciences, Chengdu 610209, China; dream2001hui@163.com (B.F.); bianjiang007@126.com (J.B.); bethlehem@163.com (J.D.); valleytramp@163.com (H.Y.)

<sup>2</sup> Laser Fusion Research Center, China Academy of Engineering Physics, Chengdu 610200, China; dream2001hui@163.com

\* Correspondence: yinjj@ioe.ac.cn; Tel.: +86-028-6413-6346

† Author Jiajia Yin and Haohao Hui contributed equally to this work.

The preparation technics of the SiO<sub>2</sub> antireflective film on K9 glass and silicon are the same. On the K9 the static water contact angle is improved from 59.9 to 130.1°. On the silicon substrate, the static water contact angle is improved from 66.5 to 131.8°.

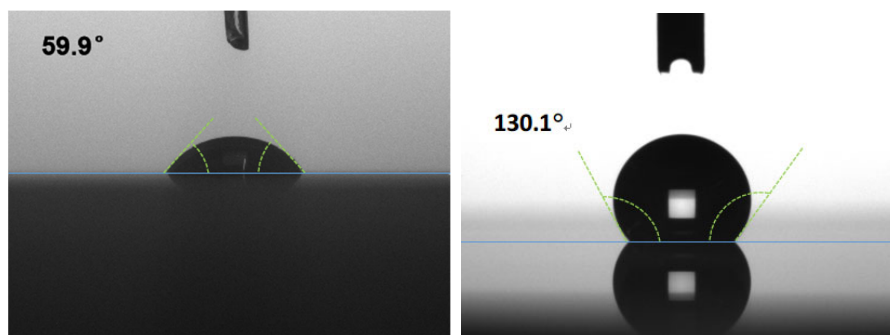

Figure S1. Water contact angle of K9 glass before and after coated with SiO<sub>2</sub> antireflective film.

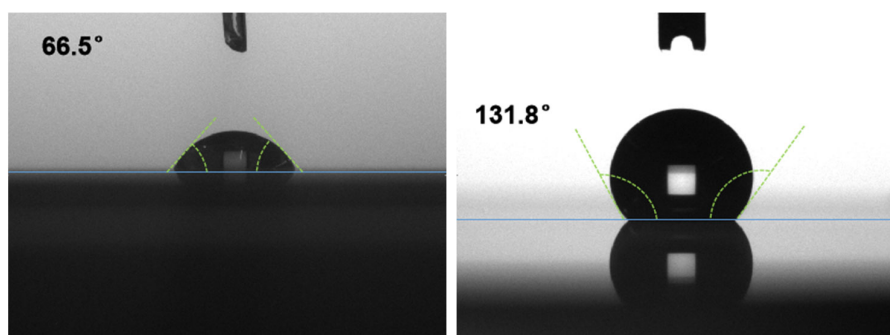

Figure S2. Water contact angle of Silicon substrate before and after coated with SiO<sub>2</sub> antireflective film.
